# Supplementary material for: The protonation state of an evolutionarily conserved histidine modulates domain swapping stability of FoxP1
Source: PubMed Central journal article supplement (PMC6443806; doi:10.1038/s41598-019-41819-5), 2019-04-01
Supplement: 41598_2019_41819_MOESM1_ESM.pdf [file 41598_2019_41819_MOESM1_ESM.pdf]

## **SUPPLEMENTARY INFORMATION**

### **The protonation state of an evolutionarily conserved histidine modulates domain swapping stability of FoxP1**

Exequiel Medina<sup>1</sup>, Pablo Villalobos<sup>1</sup>, Ricardo Coñuecar<sup>1</sup>, César A. Ramírez-Sarmiento<sup>2\*</sup> and Jorge Babul<sup>1\*</sup>

<sup>1</sup>Departamento de Biología, Facultad de Ciencias, Universidad de Chile, Las Palmeras 3425, Casilla 653, Santiago 7800003, Chile

<sup>2</sup>Institute for Biological and Medical Engineering, Schools of Engineering, Medicine and Biological Sciences, Pontificia Universidad Católica de Chile, Av. Vicuña Mackenna 4860, Santiago 7820436, Chile

\*Correspondence:

César A. Ramírez-Sarmiento (cesar.ramirez@uc.cl); Institute for Biological and Medical Engineering, Schools of Engineering, Medicine and Biological Sciences, Pontificia Universidad Católica de Chile, Av. Vicuña Mackenna 4860, Santiago 7820436, Chile

Jorge Babul (jbabul@uchile.cl); Departamento de Biología, Facultad de Ciencias, Universidad de Chile, Las Palmeras 3425, Casilla 653, Santiago 7800003, Chile

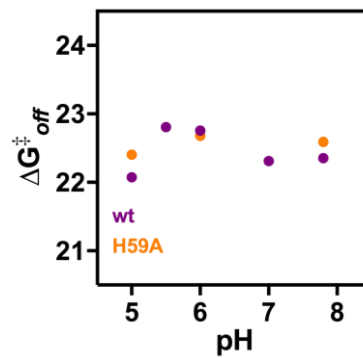

**Figure S1. Kinetic properties of FoxP1 around the pKa of its H59 side chain.** Comparison of  $\Delta G^{\ddagger}_{off}$  (dissociation) of wt (purple) and H59A mutant (orange) as a function of pH. Values were calculated using the Eyring equation.

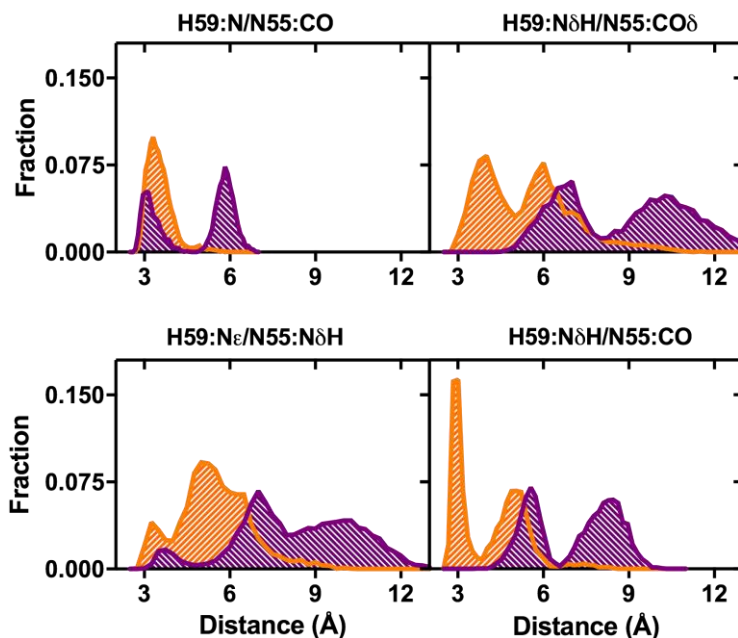

**Figure S2.** Distance distribution patterns obtained from simulations between backbone (N) and side-chain (N $\delta$  and N $\epsilon$ ) N atoms of H59 with carbonyl backbone (CO) and side chain (CO $\delta$  and N $\delta$ H) of N55. All-atom molecular simulations were performed using neutral (HSD) and protonated (HSP) states of H59, and distances between selected atoms during the MD simulations were measured using VMD.

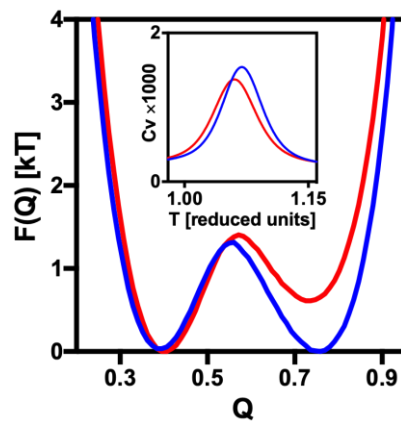

**Figure S3. Changes in the folding landscape of FoxP1 upon protonation of H59.** Free energy profile as a function of the fraction of native contacts ( $Q$ ) for wt FoxP1 with neutral (blue) or protonated (red) H59 at the  $T_F$  ( $\sim 1.058$  reduced units) of neutral H59. Simulations were ran using a structure-based coarse-grained model augmented with electrostatic interactions. The inset shows the shift in the peak and area of the heat capacity curve upon protonation of H59.

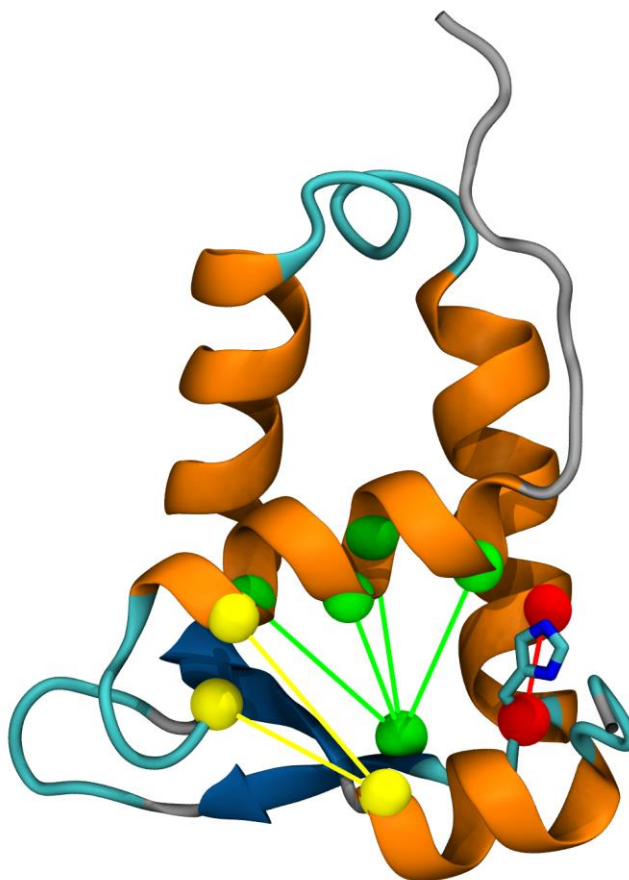

**Figure S4. Mapping of native contacts stabilized in the folding transition state of FoxP1 upon deprotonation of H59.** Cartoon representation of the monomer of FoxP1, with the residues involved in native contacts shown as spheres and residue H59 shown as sticks. Contacts between helix *H1* and strand *S2* are shown in green; contacts between helix *H5*, helix *H1* and strand *S2* are shown in yellow; and the native contact between residues H59 (helix *H3*) and N55 is shown in red.
